# Supplementary material
Source: ML conference proceedings conference paper supplement (https://openaccess.thecvf.com/content/WACV2024/html/Teigen_RGB-D_Mapping_and_WACV_2024_paper.html)
Supplement: Supplementary file 1 [file Teigen_RGB-D_Mapping_and_WACV_2024_supplemental.pdf]

# RGB-D Mapping and Tracking in a Plenoxel Radiance Field

Andreas L. Teigen<sup>1\*</sup>    Yeonsoo Park<sup>2\*</sup>    Annette Stahl<sup>1</sup>    Rudolf Mester<sup>1</sup>

<sup>1</sup>Norwegian University of Science and Technology (NTNU), Trondheim, Norway  
<sup>2</sup>Mobiltech, Seoul, Republic of Korea

andreas.l.teigen@ntnu.no

yspark@mobiltech.io

## APPENDIX

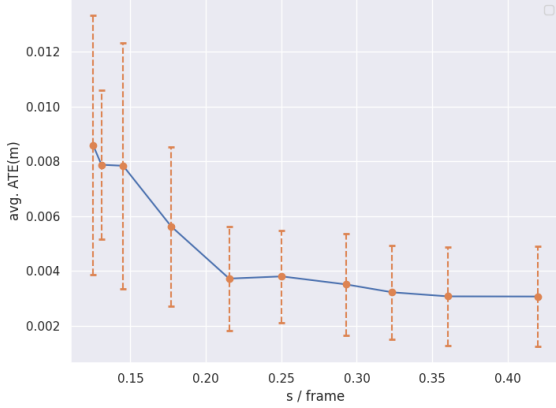

Figure 1. Average ATE error on Replica subsets regarding to the tracking speed. Standard deviation of error along 5 sequences are displayed in dotted line.

### Appendix A

We explain the derivative of a tri-linear interpolated grid function with respect to a sample location as is present in equations 8 and 9 from the paper. Let  $p_i = (x_i, y_i, z_i)$  be the sample location and let the function  $f(p)$  represent the tri-linearly interpolated grid function (Either  $\vec{c}$  or  $\vec{\sigma}$  in our case) where  $[v_{000}, \dots, v_{111}]$  are the eight closest vertices of  $p_i$ . Further let  $(x_0, y_0, z_0)$  represent the lattice points below, and  $(x_1, y_1, z_1)$  represent the lattice points above the location  $(x_i, y_i, z_i)$ . The trilinear interpolation can then be described by the equation:

$$f(p_i) = f(x, y, z) = v_i$$

$$\approx a_0 + a_1x_i + a_2y_i + a_3z_i + a_4xy_i + a_5x_iz_i + a_6y_iz_i + a_7x_iz_iz_i$$

where

$$\begin{bmatrix} 1 & x_0 & y_0 & z_0 & x_0y_0 & x_0z_0 & y_0z_0 & x_0y_0z_0 \\ 1 & x_1 & y_0 & z_0 & x_1y_0 & x_1z_0 & y_0z_0 & x_1y_0z_0 \\ 1 & x_0 & y_1 & z_0 & x_0y_1 & x_0z_0 & y_1z_0 & x_0y_1z_0 \\ 1 & x_1 & y_1 & z_0 & x_1y_1 & x_1z_0 & y_1z_0 & x_1y_1z_0 \\ 1 & x_0 & y_0 & z_1 & x_0y_0 & x_0z_1 & y_0z_1 & x_0y_0z_1 \\ 1 & x_1 & y_0 & z_1 & x_1y_0 & x_1z_1 & y_1z_1 & x_1y_0z_1 \\ 1 & x_0 & y_1 & z_1 & x_0y_1 & x_0z_1 & y_1z_1 & x_0y_1z_1 \\ 1 & x_1 & y_1 & z_1 & x_1y_1 & x_1z_1 & y_1z_1 & x_1y_1z_1 \end{bmatrix} \begin{bmatrix} a_0 \\ a_1 \\ a_2 \\ a_3 \\ a_4 \\ a_5 \\ a_6 \\ a_7 \end{bmatrix} = \begin{bmatrix} v_{000} \\ v_{001} \\ v_{010} \\ v_{011} \\ v_{100} \\ v_{101} \\ v_{110} \\ v_{111} \end{bmatrix} \quad (1)$$

As all voxels are locally independent we can treat the lower lattice points  $(x_0, y_0, z_0)$  as  $(0, 0, 0)$  greatly simplifying the equations.

Then if the partial derivatives of these equations are computed with respect to  $p_i = (x_i, y_i, z_i)$  we get:

$$\begin{aligned} \frac{\partial v_i}{\partial x_i} &= a_1 + a_4y_i + a_5z_i + a_7y_iz_i \\ \frac{\partial v_i}{\partial y_i} &= a_2 + a_4x_i + a_6z_i + a_7x_iz_i \\ \frac{\partial v_i}{\partial z_i} &= a_3 + a_5x_i + a_6y_i + a_7x_iz_i \end{aligned} \quad (2)$$

### Appendix B

Fig. 1 displays the speed-accuracy trade-off curves obtained by testing different settings across the eight sequences from the Replica dataset. Comparing the result of NICE-SLAM in table 2, it indicates that even if we reduce the allotted tracking time of our method to just 0.075s per frame, our method still outperforms NICE-SLAMs results attained using double the computation time.

\* Authors contributed equally to this work.
